# Supplementary material for: Adenosine-to-Inosine RNA Editing Within Corticolimbic Brain Regions Is Regulated in Response to Chronic Social Defeat Stress in Mice
Source: Front Psychiatry. 2019 Apr 26;10:277. doi: 10.3389/fpsyt.2019.00277 (PMC6512728; doi:10.3389/fpsyt.2019.00277)
Supplement: Supplementary file 2 [file Table_2.xlsx]

## Sheet: High confidence BLA sites
gene name	chr	location
2610002M06Rik	chrX	104982433
2900026A02Rik	chr5	113516516
4933404O12Rik	chr5	137410812
4933407H18Rik	chr5	33758586
4933407H18Rik	chr5	33759205
6030458C11Rik	chr15	12739458
9930104L06Rik	chr4	124620529
9930104L06Rik	chr4	124621545
Acan	chr7	86242858
Agl	chr3	116447622
BC004004	chr17	29438972
BLCAP	chr2	157383846
BLCAP	chr2	157383876
BLCAP	chr2	157383885
Bri3bp	chr5	125936975
Bri3bp	chr5	125937846
C330018D20Rik	chr18	57116722
Ccni	chr5	93618610
Cdh22	chr2	164937353
Chrnb1	chr11	69597905
Commd2	chr3	57448409
Commd2	chr3	57449857
COPA	chr1	174022479
Coq3	chr4	21838456
D930048N14Rik	chr11	51469601
D9Ertd402e	chr9	122745198
Dagla	chr19	10320223
Dnajc1	chr2	18137021
Dnajc18	chr18	35834187
Dtx3l	chr16	35927002
Ebna1bp2	chr4	118298678
Eps8l1	chr7	4420280
Exoc8	chr8	127418090
Fam32a	chr8	74747481
Fbxl17	chr17	63403547
Fubp3	chr2	31471414
Gabra3	chrX	69690631
Gla	chrX	131123629
Gria2a	chr3	80496208
Gria4	chr9	4456006
HTR2C	chrX	143604229
HTR2C	chrX	143604231
HTR2C	chrX	143604236
HTR2C	chrX	143604241
Iqgap1	chr7	87856938
Iqgap1	chr7	87857264
Irs4	chrX	138159167
KCNA1	chr6	126592176
Klf16	chr10	80030104
Klhl24	chr16	20123812
Lsm11	chr11	45744100
Luc7l	chr17	26420516
Mbd4	chr6	115791093
Mdc1	chr17	35994679
Mll2	chr15	98663981
Mmgt1	chrX	53840820
Mpeg1	chr19	12538752
Mrpl43	chr19	45079778
Mtap6	chr7	106468607
Ncl	chr1	88244312
Ncl	chr1	88246680
Neil1	chr9	56992115
Nol10	chr12	17436665
NOVA1	chr12	47801321
Nt5dc3	chr10	86299972
Nup155	chr15	8108190
Nup155	chr15	8109489
Nup214	chr2	31902952
Ovca2	chr11	74989934
Ovca2	chr11	74990973
Pank3	chr11	35601413
Qpctl	chr7	19725738
Rabl5	chr5	137388969
Rhoa	chr9	108239461
Rn45s	chr17	39980697
Rragd	chr4	33106395
Rragd	chr4	33107392
Rwdd2b	chr16	87434377
Samd8	chr14	22616933
Slc35e1	chr8	75004254
Slc35e2	chr4	154996006
Slc37a3	chr6	39285161
Slc39a3	chr10	80493184
Snhg11	chr2	158209361
Tbc1d16	chr11	119008114
Tcp11l1	chr2	104521242
Tln2	chr9	67065873
Tln2	chr9	67067845
TMEM63B	chr17	45799898
Trove2	chr1	145602513
UNC80	chr1	66719288
Vamp4	chr1	164528329
Wipi2	chr5	143145189
Zbtb4	chr11	69596633
Zfp324	chr7	13557536
Zfp397	chr18	24118879
Zfp597	chr16	3863121
Zfp941	chr7	147996111
Zim1	chr7	6628358
Zyg11b	chr4	107903225

## Sheet: High confidence mPFC sites
gene name	chr	location
2900026A02Rik	chr5	113516516
4933404O12Rik	chr5	137410812
4933407H18Rik	chr5	33757989
4933407H18Rik	chr5	33758586
4933407H18Rik	chr5	33759205
6030458C11Rik	chr15	12739458
9930104L06Rik	chr4	124620529
9930104L06Rik	chr4	124621545
Acan	chr7	86242858
Agl	chr3	116447622
BC004004	chr17	29438972
BLCAP	chr2	157383846
BLCAP	chr2	157383876
BLCAP	chr2	157383885
Bri3bp	chr5	125936975
Bri3bp	chr5	125937846
C330018D20Rik	chr18	57116722
Ccni	chr5	93618610
Cdh22	chr2	164937353
Chrnb1	chr11	69597905
COG3	chr14	76119526
Commd2	chr3	57448409
Commd2	chr3	57449857
COPA	chr1	174022479
Coq3	chr4	21838456
D930048N14Rik	chr11	51469601
D9Ertd402e	chr9	122745198
Dagla	chr19	10320223
Dnajc1	chr2	18137021
Dnajc18	chr18	35834187
Dtx3l	chr16	35927002
Ebna1bp2	chr4	118298678
Eps8l1	chr7	4420280
Exoc8	chr8	127418090
Fam32a	chr8	74747481
Fbxl17	chr17	63403547
Fubp3	chr2	31471414
Gabra3	chrX	69690631
Gla	chrX	131123629
Gria2a	chr3	80496208
Gria4	chr9	4456006
HTR2C	chrX	143604229
HTR2C	chrX	143604231
HTR2C	chrX	143604236
HTR2C	chrX	143604241
Iqgap1	chr7	87856938
Iqgap1	chr7	87857264
Irs4	chrX	138159167
KCNA1	chr6	126592176
Klf16	chr10	80030104
Klhl24	chr16	20123812
Lsm11	chr11	45744100
Luc7l	chr17	26420516
Mad2l1	chr6	66490201
Mbd4	chr6	115791093
Mdc1	chr17	35994679
Mll2	chr15	98663981
Mmgt1	chrX	53840820
Mpeg1	chr19	12538752
Mrpl43	chr19	45079778
Mtap6	chr7	106468607
Ncl	chr1	88244312
Ncl	chr1	88246680
Neil1	chr9	56992115
Nol10	chr12	17436665
NOVA1	chr12	47801321
Nt5dc3	chr10	86299972
Nup155	chr15	8108190
Nup155	chr15	8109489
Nup214	chr2	31902952
Ovca2	chr11	74989934
Ovca2	chr11	74990973
Pank3	chr11	35601413
Qpctl	chr7	19725738
Rabl5	chr5	137388969
Rhoa	chr9	108239461
Rn45s	chr17	39980697
Rpl7l1	chr17	46911886
Rragd	chr4	33106395
Rragd	chr4	33107392
Rsad1	chr11	94403347
Rwdd2b	chr16	87434377
Samd8	chr14	22616933
Slc35e1	chr8	75004254
Slc35e2	chr4	154996006
Slc37a3	chr6	39285161
Slc39a3	chr10	80493184
Slfn5	chr11	82776086
Snhg11	chr2	158209361
Tbc1d16	chr11	119008114
Tcp11l1	chr2	104521242
Tln2	chr9	67065873
Tln2	chr9	67067845
TMEM63B	chr17	45799898
Trove2	chr1	145602513
Vamp4	chr1	164528329
Wipi2	chr5	143145189
Zfp324	chr7	13557536
Zfp397	chr18	24118879
Zfp397	chr18	24119129
Zfp597	chr16	3863121
Zfp81	chr17	33472367
Zfp941	chr7	147996111
Zim1	chr7	6628358
Zyg11b	chr4	107903225
